# Supplementary material
Source: Research Square preprint supplement (doi:10.21203/rs.3.rs-9859817/v1)
Supplement: Supplementary file 1 [file 490c8faecdff598aa11ffcee.docx]

**Supplementary Video 1**

Experimental mode conversion from a line-shaped intensity distribution to a circular pattern.

**Supplementary Video 2**

Pulse train evolution captured under the initial STML event, as the number of recorded spatial spots increases from 1 to 5 using an oscilloscope.

**Supplementary Video 3**

Simulated pulse generation dynamics under varying STML conditions.

**Supplementary Video 4**

Pulse train evolution captured under the first STML and one SPI-STML event, as the number of recorded spatial spots increases from 1 to 5.

**Supplementary Video 5**

Pulse train evolution captured under the first STML and two SPI-STML events.

**Supplementary Video 6**

Pulse train evolution captured under the first STML and three SPI-STML events.

**Supplementary Video 7**

Pulse train evolution captured under the first STML and four SPI-STML events.
